# Supplementary material for: Ultrasensitive Ag-coated TiO2nanotube arrays for flexible SERS-based optofluidic devices
Source: Royal Society of Chemistry journal article supplement (doi:10.1039/c5tc01154j), 2015-01-01
Supplement: c5tc01154j1.pdf [file c5tc01154j1.pdf]

**Supporting information**

# **Ultrasensitive Ag-coated TiO<sub>2</sub> nanotube array for flexible SERS-based optofluidic devices**

*Andrea Lamberti<sup>a,\*</sup>, Alessandro Virga<sup>a</sup>, Alessandro Chiadò<sup>a</sup>, Angelica Chiodoni<sup>b</sup>, Katarzyna Bejtka<sup>b</sup>, Paola Rivolo<sup>a</sup> and Fabrizio Giorgis<sup>a,b,\*</sup>*

<sup>a</sup> Department of Applied Science and Technology, Politecnico di Torino, C.so Duca degli Abruzzi 24 10129, Torino, ITALY

<sup>b</sup> Istituto Italiano di Tecnologia, Center for Space Human Robotics, C.so Trento 21 10129, Torino, ITALY

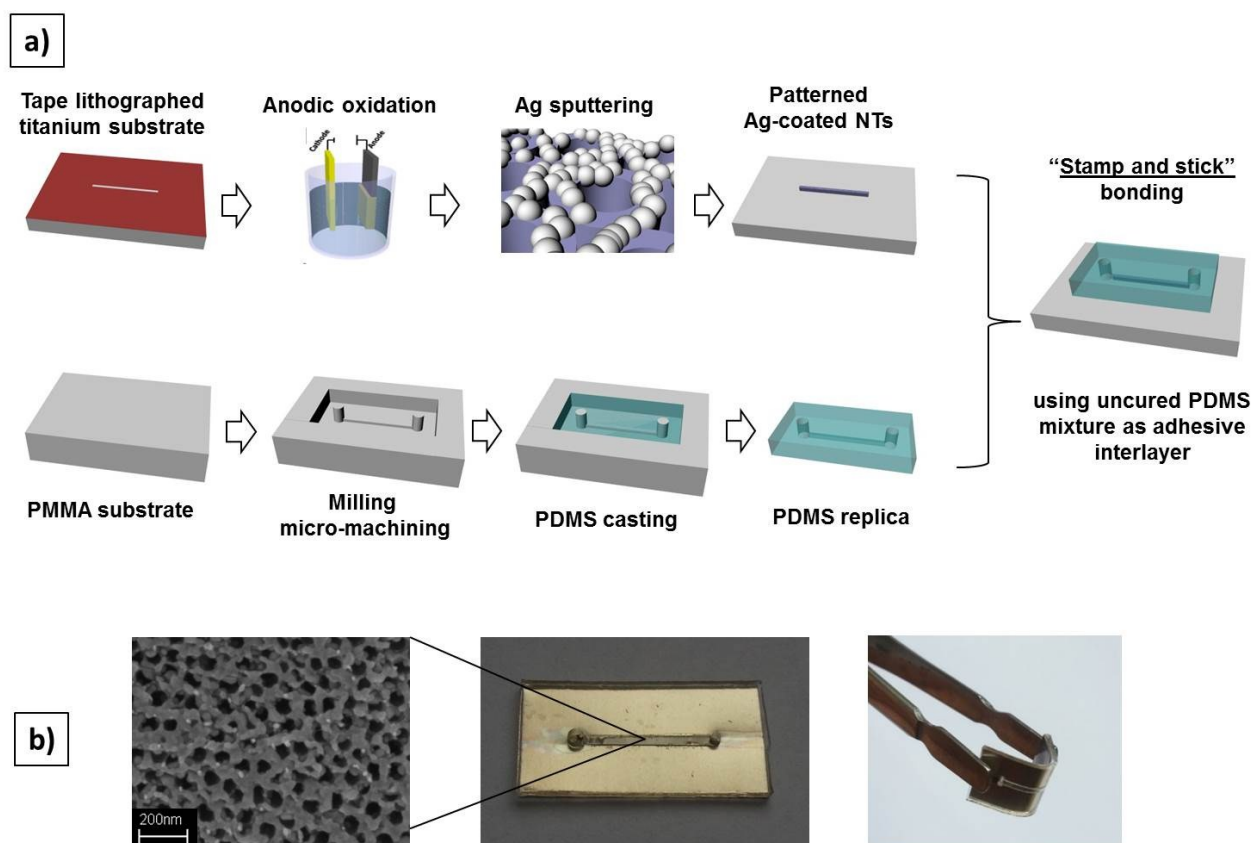

**Figure S1.** In panel a) the 3D schematic of the optofluidic device fabrication process is presented: Ti foil was masked with Kapton tape, anodized to growth patterned  $\text{TiO}_2$  NTs, decorated with Ag NPs by sputtering and used as substrate for microfluidic integration. PMMA master was fabricated by milling machine, replicated by PDMS casting, curing in oven and removal of the replica. The microfluidic cover was bonded with the active substrate by stamp and stick method. The resulting device is shown in panel b).

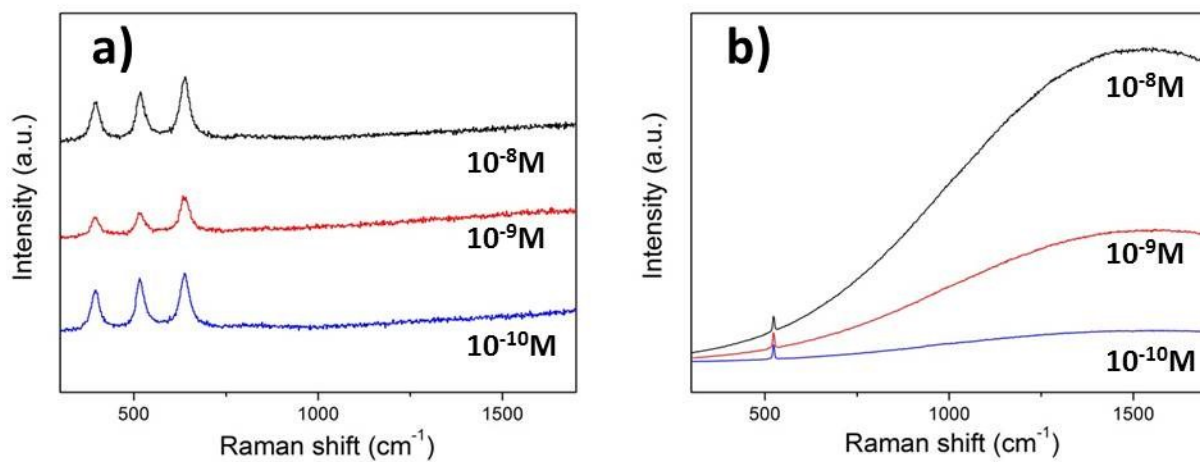

**Figure S2.** Raman spectra of R6G solution at different concentration collected on  $\text{TiO}_2$  nanotubes array (a) and silicon wafer (b).
